# Supplementary material for: Association of Common Genetic Variants in Pre-microRNAs and Neuroblastoma Susceptibility: A Two-Center Study in Chinese Children
Source: PubMed Central journal article supplement — Mol Ther Nucleic Acids. 2018 Jan 31;11:1–8. doi: 10.1016/j.omtn.2018.01.003 (PMC5849804; doi:10.1016/j.omtn.2018.01.003), 2018-01-31
Supplement: mmc1.pdf [file mmc1.pdf]

**OMTN, Volume 11**

**Supplemental Information**

**Association of Common Genetic Variants in  
Pre-microRNAs and Neuroblastoma Susceptibility:  
A Two-Center Study in Chinese Children**

**Jing He, Yan Zou, Xiaodan Liu, Jinhong Zhu, Jiao Zhang, Ruizhong Zhang, Tianyou Yang, and Huimin Xia**

**Table S1** Frequency distribution of selected characteristics in neuroblastoma cases and cancer-free controls

| Variables                    | Guangdong province |       |                  |       | <i>P</i> <sup>a</sup> | Henan province |       |                  |       | <i>P</i> <sup>a</sup> |
|------------------------------|--------------------|-------|------------------|-------|-----------------------|----------------|-------|------------------|-------|-----------------------|
|                              | Cases (N=275)      |       | Controls (N=531) |       |                       | Cases (N=118)  |       | Controls (N=281) |       |                       |
|                              | No.                | %     | No.              | %     |                       | No.            | %     | No.              | %     |                       |
| Age range, month             | 0-132              |       | 0.07-156         |       | 0.229                 | 0-131.1        |       | 0.1-144.0        |       | 0.484                 |
| Mean ± SD                    | 31.50±25.43        |       | 29.73±24.86      |       |                       | 46.24±29.98    |       | 44.97±33.23      |       |                       |
| <12                          | 70                 | 25.45 | 145              | 27.31 |                       | 9              | 7.63  | 32               | 11.39 |                       |
| 12-60                        | 177                | 64.36 | 313              | 58.95 |                       | 76             | 64.41 | 179              | 63.70 |                       |
| >60                          | 28                 | 10.18 | 73               | 13.75 |                       | 33             | 27.97 | 70               | 24.91 |                       |
| Gender                       |                    |       |                  |       | 0.510                 |                |       |                  |       | 0.196                 |
| Female                       | 114                | 41.45 | 233              | 43.88 |                       | 54             | 45.76 | 109              | 38.79 |                       |
| Male                         | 161                | 58.55 | 298              | 56.12 |                       | 64             | 54.24 | 172              | 61.21 |                       |
| Clinical stages <sup>b</sup> |                    |       |                  |       |                       |                |       |                  |       |                       |
| I                            | 54                 | 19.64 |                  |       |                       | 15             | 12.71 |                  |       |                       |
| II                           | 62                 | 22.55 |                  |       |                       | 31             | 26.27 |                  |       |                       |
| III                          | 49                 | 17.82 |                  |       |                       | 19             | 16.10 |                  |       |                       |
| IV                           | 94                 | 34.18 |                  |       |                       | 49             | 41.53 |                  |       |                       |
| 4s                           | 8                  | 2.91  |                  |       |                       | 3              | 2.54  |                  |       |                       |
| NA                           | 8                  | 2.91  |                  |       |                       | 1              | 0.85  |                  |       |                       |
| Sites of origin              |                    |       |                  |       |                       |                |       |                  |       |                       |
| Adrenal gland                | 64                 | 23.27 |                  |       |                       | 89             | 75.42 |                  |       |                       |
| Retroperitoneal region       | 87                 | 31.64 |                  |       |                       | /              | /     |                  |       |                       |
| Mediastinum                  | 90                 | 32.73 |                  |       |                       | 19             | 16.10 |                  |       |                       |
| Other region                 | 26                 | 9.45  |                  |       |                       | 10             | 8.47  |                  |       |                       |
| NA                           | 8                  | 2.91  |                  |       |                       | /              | /     |                  |       |                       |

SD, standard deviation; NA, not available.

<sup>a</sup> Two-sided  $\chi^2$  test for distributions between neuroblastoma cases and cancer-free controls.

<sup>b</sup> INSS criteria defined stage 4s as age <1 year old with localized primary tumor as delineated in stage I or II, with dissemination limited to liver, skin, or bone marrow.

**Table S2** Logistic regression analyses on associations between selected polymorphisms and neuroblastoma risk in Chinese children (homozygous and allele comparing models)

| miRNA            | SNP        | Allele |   | Case (N=393) |     |    | Control (N=812) |     |     | Homozygous (BB vs. AA)    |                | Allele comparing (B vs. A) |                |
|------------------|------------|--------|---|--------------|-----|----|-----------------|-----|-----|---------------------------|----------------|----------------------------|----------------|
|                  |            | A      | B | AA           | AB  | BB | AA              | AB  | BB  | AOR <sup>a</sup> (95% CI) | P <sup>a</sup> | AOR <sup>a</sup> (95% CI)  | P <sup>a</sup> |
| <i>miR-27a</i>   | rs895819   | T      | C | 220          | 153 | 20 | 442             | 312 | 58  | 0.70 (0.41-1.19)          | 0.185          | 0.91 (0.75-1.11)           | 0.354          |
| <i>miR-34b/c</i> | rs4938723  | T      | C | 221          | 107 | 49 | 377             | 358 | 75  | 1.11 (0.75-1.66)          | 0.597          | <b>0.82 (0.68-0.99)</b>    | <b>0.039</b>   |
| <i>miR-137</i>   | rs1625579  | T      | G | 343          | 46  | 3  | 719             | 90  | 1   | 6.28 (0.65-60.51)         | 0.112          | 1.18 (0.83-1.68)           | 0.354          |
| <i>miR-146a</i>  | rs2910164  | C      | G | 142          | 189 | 60 | 282             | 397 | 130 | 0.91 (0.63-1.32)          | 0.621          | 0.95 (0.80-1.14)           | 0.591          |
| <i>miR-149</i>   | rs2292832  | T      | C | 286          | 62  | 32 | 560             | 172 | 59  | 1.06 (0.68-1.67)          | 0.789          | 0.88 (0.70-1.11)           | 0.294          |
| <i>miR-196a2</i> | rs11614913 | T      | C | 107          | 192 | 94 | 230             | 399 | 183 | 1.10 (0.79-1.55)          | 0.566          | 1.05 (0.89-1.25)           | 0.566          |
| <i>miR-218</i>   | rs11134527 | A      | G | 154          | 164 | 73 | 276             | 403 | 131 | 1.00 (0.70-1.41)          | 0.986          | 0.94 (0.79-1.12)           | 0.504          |
| <i>miR-423</i>   | rs6505162  | C      | A | 244          | 132 | 17 | 522             | 258 | 31  | 1.16 (0.63-2.15)          | 0.626          | 1.08 (0.88-1.34)           | 0.436          |
| <i>miR-608</i>   | rs4919510  | G      | C | 127          | 190 | 76 | 227             | 405 | 179 | 0.76 (0.54-1.08)          | 0.112          | 0.87 (0.73-1.03)           | 0.099          |

AOR, adjusted odds ratio; CI, confidence interval.

The results were in bold if the 95% CI excluded 1 or  $P < 0.05$ .

<sup>a</sup> Adjusted for age and gender.

**Table S3** Function of selected polymorphisms as predicted by SNPinfo (<http://snpinfo.niehs.nih.gov/>) software

| miRNA            | rs         | Chr | Allele | TFBS | Splicing (ESE or ESS) | Allele | Asian | CHB   |
|------------------|------------|-----|--------|------|-----------------------|--------|-------|-------|
| <i>miR-27a</i>   | rs895819   | 19  | C/T    | Y    | Y                     | T      | --    | 0.711 |
| <i>miR-34b/c</i> | rs4938723  | 11  | C/T    | Y    | --                    | T      | 0.669 | 0.643 |
| <i>miR-137</i>   | rs1625579  | 1   | T/G    | --   | --                    | T      | 0.947 | 0.940 |
| <i>miR-146a</i>  | rs2910164  | 5   | C/G    | Y    | Y                     | G      | 0.469 | 0.446 |
| <i>miR-149</i>   | rs2292832  | 2   | C/T    | Y    | Y                     | C      | 0.339 | 0.315 |
| <i>miR-196a2</i> | rs11614913 | 12  | C/T    | Y    | Y                     | C      | 0.427 | 0.411 |
| <i>miR-218</i>   | rs11134527 | 5   | A/G    | Y    | --                    | G      | 0.417 | 0.367 |
| <i>miR-423</i>   | rs6505162  | 17  | A/C    | Y    | Y                     | C      | 0.811 | 0.833 |
| <i>miR-608</i>   | rs4919510  | 10  | C/G    | Y    | Y                     | C      | 0.491 | 0.488 |

TFBS, transcription factor binding sites; ESE, exon splicing enhancer; ESS, exon splicing silencer; CHB, Han Chinese in Beijing, China.

**Table S4** Association of *miR-34b/c* rs4938723 T>C and *miR-218* rs11134527 A>G polymorphisms with neuroblastoma susceptibility

| Genotype       | Guangdong province |                     |                                      |                | Henan province   |                     |                                      |                | Combined         |                     |                                      |                   |
|----------------|--------------------|---------------------|--------------------------------------|----------------|------------------|---------------------|--------------------------------------|----------------|------------------|---------------------|--------------------------------------|-------------------|
|                | Cases<br>(N=275)   | Controls<br>(N=531) | Adjusted OR<br>(95% CI) <sup>a</sup> | P <sup>a</sup> | Cases<br>(N=118) | Controls<br>(N=281) | Adjusted OR<br>(95% CI) <sup>a</sup> | P <sup>a</sup> | Cases<br>(N=393) | Controls<br>(N=812) | Adjusted OR<br>(95% CI) <sup>a</sup> | P <sup>a</sup>    |
| rs4938723 T>C  |                    |                     |                                      |                |                  |                     |                                      |                |                  |                     |                                      |                   |
| TT             | 147 (56.76)        | 244 (46.12)         | 1.00                                 |                | 74 (62.71)       | 133 (47.33)         | 1.00                                 |                | 221 (58.62)      | 377 (46.54)         | 1.00                                 |                   |
| TC             | 80 (30.89)         | 236 (44.61)         | <b>0.56 (0.41-0.78)</b>              | <b>0.0005</b>  | 27 (22.88)       | 122 (43.42)         | <b>0.40 (0.24-0.67)</b>              | <b>0.0004</b>  | 107 (28.38)      | 358 (44.20)         | <b>0.51 (0.39-0.67)</b>              | <b>&lt;0.0001</b> |
| CC             | 32 (12.36)         | 49 (9.26)           | 1.07 (0.65-1.75)                     | 0.797          | 17 (14.41)       | 26 (9.25)           | 1.15 (0.58-2.26)                     | 0.690          | 49 (13.00)       | 75 (9.26)           | 1.11 (0.75-1.66)                     | 0.597             |
| Additive       |                    |                     | 0.84 (0.67-1.05)                     | 0.122          |                  |                     | 0.79 (0.57-1.10)                     | 0.162          |                  |                     | <b>0.83 (0.69-0.997)</b>             | <b>0.046</b>      |
| Dominant       | 112 (43.24)        | 285 (53.88)         | <b>0.65 (0.48-0.88)</b>              | <b>0.005</b>   | 44 (37.29)       | 148 (52.67)         | <b>0.54 (0.35-0.83)</b>              | <b>0.006</b>   | 156 (41.38)      | 433 (53.46)         | <b>0.62 (0.48-0.79)</b>              | <b>0.0001</b>     |
| Recessive      | 227 (87.64)        | 480 (90.74)         | 1.36 (0.85-2.19)                     | 0.202          | 101 (85.59)      | 255 (90.75)         | 1.60 (0.83-3.08)                     | 0.162          | 328 (87.00)      | 735 (90.74)         | 1.46 (1.00-2.15)                     | 0.052             |
| T              | 374 (72.20)        | 724 (68.43)         | 1.00                                 |                | 175 (74.15)      | 388 (69.04)         | 1.00                                 |                | 549 (72.81)      | 1112 (68.64)        | 1.00                                 |                   |
| C              | 144 (27.80)        | 334 (31.57)         | 0.83 (0.66-1.05)                     | 0.113          | 61 (25.85)       | 174 (30.96)         | 0.77 (0.55-1.09)                     | 0.141          | 205 (27.19)      | 508 (31.36)         | <b>0.82 (0.68-0.99)</b>              | <b>0.039</b>      |
| rs11134527 A>G |                    |                     |                                      |                |                  |                     |                                      |                |                  |                     |                                      |                   |
| AA             | 107 (39.19)        | 162 (30.62)         | 1.00                                 |                | 47 (39.83)       | 114 (40.57)         | 1.00                                 |                | 154 (39.39)      | 276 (34.07)         | 1.00                                 |                   |
| AG             | 117 (42.86)        | 286 (54.06)         | <b>0.62 (0.45-0.86)</b>              | <b>0.004</b>   | 47 (39.83)       | 117 (41.64)         | 0.98 (0.61-1.59)                     | 0.940          | 164 (41.94)      | 403 (49.75)         | <b>0.73 (0.56-0.96)</b>              | <b>0.022</b>      |
| GG             | 49 (17.95)         | 81 (15.31)          | 0.90 (0.58-1.38)                     | 0.618          | 24 (20.34)       | 50 (17.79)          | 1.17 (0.65-2.12)                     | 0.602          | 73 (18.67)       | 131 (16.17)         | 1.00 (0.70-1.41)                     | 0.986             |
| Additive       |                    |                     | 0.87 (0.70-1.08)                     | 0.211          |                  |                     | 1.07 (0.80-1.43)                     | 0.666          |                  |                     | 0.94 (0.79-1.12)                     | 0.509             |
| Dominant       | 166 (60.81)        | 367 (69.38)         | <b>0.68 (0.50-0.93)</b>              | <b>0.014</b>   | 71 (60.17)       | 167 (59.43)         | 1.04 (0.67-1.61)                     | 0.866          | 237 (60.61)      | 534 (65.93)         | 0.80 (0.62-1.02)                     | 0.073             |
| Recessive      | 224 (82.05)        | 448 (84.69)         | 1.18 (0.80-1.75)                     | 0.401          | 94 (79.66)       | 231 (82.21)         | 1.18 (0.69-2.04)                     | 0.546          | 318 (81.33)      | 679 (83.83)         | 1.19 (0.86-1.63)                     | 0.290             |
| A              | 331 (60.62)        | 610 (57.66)         | 1.00                                 |                | 141 (59.75)      | 345 (61.39)         | 1.00                                 |                | 472 (60.36)      | 955 (58.95)         | 1.00                                 |                   |
| G              | 215 (39.38)        | 448 (42.34)         | 0.88 (0.71-1.08)                     | 0.219          | 95 (40.25)       | 217 (38.61)         | 1.08 (0.79-1.47)                     | 0.645          | 310 (39.64)      | 665 (41.05)         | 0.94 (0.79-1.12)                     | 0.504             |

OR, odds ratio; CI, confidence interval.

The results were in bold if the 95% CI excluded 1 or  $P < 0.05$ .<sup>a</sup>  $\chi^2$  test for genotype distributions between neuroblastoma patients and controls.<sup>b</sup> Adjusted for age and gender.
